# Supplementary material
Source: publisher site journal article supplement (https://www.dovepress.com/article/217388)
Supplement: Supplementary file 1 [file get_supplementary_file.php]

| **Table S1:** Mean age difference (in months) at attaining pubertal milestone when comparing SGA to AGA and LGA to AGA. | | | | | | |
| --- | --- | --- | --- | --- | --- | --- |
|  |  | SGA | | AGA | LGA | |
| Pubertal milestone | *n*a | Unadjusted age difference | Adjusted age difference (95%CI)b | Reference | Unadjusted age difference | Adjusted age difference (95%CI)b |
| **Boys** |  |  |  |  |  |  |
| Tanner genital stage 2 | 6,927 | 0.2 | 0.4 (-1.1 to 1.8) | 0 (ref) | -1.3 | -1.5 (-3.1 to 0.0) |
| Tanner genital stage 3 | 6,927 | -0.8 | -0.6 (-1.9 to 0.8) | 0 (ref) | -2.5 | -2.1 (-3.6 to -0.7) |
| Tanner genital stage 4 | 6,927 | -0.9 | -0.3 (-1.8 to 1.1) | 0 (ref) | -1.9 | -1.9 (-3.3 to -0.5) |
| Tanner genital stage 5 | 6,927 | -0.7 | 0.0 (-2.2 to 2.3) | 0 (ref) | -2.0 | -1.5 (-3.7 to 0.7) |
| Tanner pubic hair stage 2 | 6,931 | -0.1 | 0.3 (-1.0 to 1.7) | 0 (ref) | -0.9 | -0.7 (-2.1 to 0.8) |
| Tanner pubic hair stage 3 | 6,931 | -0.9 | -0.6 (-1.8 to 0.6) | 0 (ref) | -2.1 | -1.5 (-2.8 to -0.3) |
| Tanner pubic hair stage 4 | 6,931 | -1.2 | -0.6 (-1.8 to 0.5) | 0 (ref) | -1.3 | -1.0 (-2.1 to 0.2) |
| Tanner pubic hair stage 5 | 6,931 | -1.7 | -1.1 (-2.7 to 0.5) | 0 (ref) | -2.1 | -2.0 (-3.5 to -0.5) |
| Axillary Hair | 6,936 | -2.4 | -2.1 (-3.6 to -0.6) | 0 (ref) | -0.7 | -0.6 (-2.4 to 1.1) |
| Acne | 6,936 | -2.4 | -1.7 (-3.1 to -0.4) | 0 (ref) | -0.9 | -0.7 (-2.2 to 0.7) |
| Voice Break | 6,742 | -0.9 | -0.7 (-2.1 to 0.7) | 0 (ref) | -0.9 | -0.7 (-2.1 to 0.8) |
| Adult Voice | 6,742 | -0.1 | 0.6 (-1.9 to 3.0) | 0 (ref) | 0.7 | 0.8 (-1.8 to 3.3) |
| First Ejaculation | 6,923 | -0.1 | 0.0 (-1.4 to 1.4) | 0 (ref) | -1.1 | -0.5 (-1.9 to 0.9) |
| **Girls** |  |  |  |  |  |  |
| Tanner breast stage 2 | 7,348 | 0.5 | 0.4 (-1.5 to 2.3) | 0 (ref) | -1.0 | -0.4 (-2.5 to 1.8) |
| Tanner breast stage 3 | 7,348 | -0.3 | -0.6 (-1.9 to 0.6) | 0 (ref) | 1.4 | 1.6 (0.1 to 3.0) |
| Tanner breast stage 4 | 7,348 | 0.5 | -0.2 (-1.5 to 1.1) | 0 (ref) | 2.0 | 2.1 (0.7 to 3.6) |
| Tanner breast stage 5 | 7,348 | -0.9 | -1.8 (-4.1 to 0.5) | 0 (ref) | 0.4 | 1.2 (-1.5 to 3.8) |
| Tanner pubic hair stage 2 | 7,349 | -1.4 | -1.6 (-2.6 to -0.5) | 0 (ref) | 1.5 | 1.5 (0.3 to 2.7) |
| Tanner pubic hair stage 3 | 7,349 | -1.4 | -1.7 (-2.7 to -0.7) | 0 (ref) | 1.3 | 1.4 (0.2 to 2.5) |
| Tanner pubic hair stage 4 | 7,349 | -1.3 | -1.7 (-2.9 to -0.4) | 0 (ref) | 1.9 | 2.0 (0.6 to 3.4) |
| Tanner pubic hair stage 5 | 7,349 | -1.5 | -1.6 (-3.5 to 0.3) | 0 (ref) | 1.4 | 2.1 (0.0 to 4.3) |
| Axillary Hair | 7,354 | -1.7 | -1.9 (-3.4 to -0.5) | 0 (ref) | 1.8 | 1.8 (0.3 to 3.4) |
| Acne | 7,354 | -2.5 | -2.1 (-3.6 to -0.6) | 0 (ref) | 2.1 | 1.9 (0.2 to 3.5) |
| Menarche | 7,346 | -1.9 | -2.3 (-3.4 to -1.2) | 0 (ref) | 1.4 | 1.7 (0.5 to 2.9) |
| **Notes:** aNumber of observations in adjusted analyses. Numbers vary since some children did not provide information on all outcome variables.  bAdjusted for parity, maternal age at menarche, maternal pre-pregnancy BMI, maternal smoking during first trimester and highest educational class of parents  **Abbreviations:** AGA, appropriate-for-gestational age; BMI, body mass index; CI, confidence interval; LGA, large-for-gestational age SGA, small-for-gestational age. | | | | | | |

| **Table S2:** Mean age difference (in months) at attaining pubertal milestone when comparing SGA to AGA, stratified by gestational age categorized as term or preterm. | | | | | | | | | |
| --- | --- | --- | --- | --- | --- | --- | --- | --- | --- |
|  | Preterm (GA<37+0 weeks) | | | |  | Term (GA≥37+0 weeks) | | | |
|  |  | AGA | SGA | |  |  | AGA | SGA | |
| Pubertal milestone | *n*a | Reference | Unadjusted age difference | Adjusted age difference (95%CI)b |  | *n*a | Reference | Unadjusted age difference | Adjusted age difference (95%CI)b |
| **Boys** |  |  |  |  |  |  |  |  |  |
| Tanner genital stage 2 | 538 | 0 | 0.4 | 0.4 (-3.2 to 4.1) |  | 6,389 | 0 | 0.1 | 0.3 (-1.3 to 1.8) |
| Tanner genital stage 3 | 538 | 0 | 1.5 | 1.6 (-2.0 to 5.2) |  | 6,389 | 0 | -1.0 | -0.8 (-2.3 to 0.6) |
| Tanner genital stage 4 | 538 | 0 | -0.7 | -1.3 (-5.0 to 2.4) |  | 6,389 | 0 | -0.8 | -0.2 (-1.8 to 1.3) |
| Tanner genital stage 5 | 538 | 0 | 0.3 | -0.2 (-6.4 to 6.0) |  | 6,389 | 0 | -0.7 | 0.0 (-2.4 to 2.3) |
| Tanner pubic hair stage 2 | 539 | 0 | -1.5 | -1.6 (-5.3 to 2.2) |  | 6,392 | 0 | 0.0 | 0.4 (-1.0 to 1.8) |
| Tanner pubic hair stage 3 | 539 | 0 | -1.2 | -1.4 (-4.4 to 1.6) |  | 6,392 | 0 | -0.9 | -0.6 (-1.8 to 0.7) |
| Tanner pubic hair stage 4 | 539 | 0 | -2.1 | -2.5 (-5.8 to 0.7) |  | 6,392 | 0 | -1.1 | -0.5 (-1.7 to 0.8) |
| Tanner pubic hair stage 5 | 539 | 0 | -0.2 | -0.2 (-4.7 to 4.2) |  | 6,392 | 0 | -1.8 | -1.3 (-2.9 to 0.4) |
| Axillary Hair | 540 | 0 | -3.7 | -4.2 (-8.7 to 0.2) |  | 6,396 | 0 | -2.2 | -1.9 (-3.5 to -0.3) |
| Acne | 540 | 0 | -5.7 | -5.9 (-9.7 to -2.1) |  | 6,396 | 0 | -2.0 | -1.2 (-2.7 to 0.2) |
| Voice Break | 521 | 0 | 0.6 | 0.2 (-3.7 to 4.2) |  | 6,221 | 0 | -1.1 | -0.8 (-2.3 to 0.6) |
| Adult Voice | 521 | 0 | 1.5 | 0.4 (-6.2 to 6.9) |  | 6,221 | 0 | -0.2 | 0.5 (-2.1 to 3.1) |
| First Ejaculation | 538 | 0 | 1.0 | 1.1 (-2.8 to 5.1) |  | 6,385 | 0 | -0.2 | -0.2 (-1.7 to 1.3) |
| **Girls** |  |  |  |  |  |  |  |  |  |
| Tanner breast stage 2 | 482 | 0 | -0.2 | 0.8 (-4.3 to 5.9) |  | 6,866 | 0 | 0.5 | 0.3 (-1.7 to 2.3) |
| Tanner breast stage 3 | 482 | 0 | -0.9 | -1.6 (-5.2 to 2.0) |  | 6,866 | 0 | -0.3 | -0.6 (-1.9 to 0.7) |
| Tanner breast stage 4 | 482 | 0 | -1.4 | -2.4 (-6.7 to 2.0) |  | 6,866 | 0 | 0.5 | -0.1 (-1.5 to 1.2) |
| Tanner breast stage 5 | 482 | 0 | 1.2 | -0.6 (-7.8 to 6.5) |  | 6,866 | 0 | -1.0 | -1.9 (-4.4 to 0.5) |
| Tanner pubic hair stage 2 | 482 | 0 | -2.5 | -2.6 (-6.1 to 0.9) |  | 6,867 | 0 | -1.3 | -1.5 (-2.6 to -0.4) |
| Tanner pubic hair stage 3 | 482 | 0 | -4.4 | -4.6 (-8.0 to -1.2) |  | 6,867 | 0 | -1.1 | -1.5 (-2.5 to -0.4) |
| Tanner pubic hair stage 4 | 482 | 0 | -4.2 | -3.9 (-7.9 to 0.1) |  | 6,867 | 0 | -1.0 | -1.4 (-2.8 to -0.1) |
| Tanner pubic hair stage 5 | 482 | 0 | -2.1 | -1.6 (-8.2 to 4.9) |  | 6,867 | 0 | -1.3 | -1.5 (-3.5 to 0.5) |
| Axillary Hair | 482 | 0 | -4.5 | -4.2 (-8.0 to -0.3) |  | 6,872 | 0 | -1.5 | -1.7 (-3.2 to -0.2) |
| Acne | 482 | 0 | -3.6 | -3.3 (-8.0 to 1.5) |  | 6,872 | 0 | -2.3 | -2.0 (-3.5 to -0.4) |
| Menarche | 481 | 0 | -2.7 | -2.9 (-5.7 to 0.0) |  | 6,865 | 0 | -1.8 | -2.2 (-3.3 to -1.0) |
| **Notes:** aNumber of observations in adjusted analyses. Numbers vary since some children did not provide information on all outcome variables.  bAdjusted for parity, maternal age at menarche, maternal pre-pregnancy BMI, maternal smoking during first trimester and highest educational class of parents  **Abbrevations:** AGA, appropriate-for-gestational age; BMI, body mass index; CI, confidence interval; GA, gestational age; LGA, large-for-gestational age SGA, small-for-gestational age. | | | | | | | | | |
| | **Table S3:** Mean age difference (in months) at attaining pubertal milestone for each 1-unit increase in Z-score in the period from 0 to 12 months stratified by birth weight Z-score. | | | | | | | | --- | --- | --- | --- | --- | --- | --- | |  | Birth weight Z-score ≤ 33.33 percentile | | | Birth weight Z-score > 33.33 percentile | | | | Pubertal milestone | *n*a | Unadjusted age difference | Adjusted age difference (95% CI)b | *n*a | Unadjusted age difference | Adjusted age difference (95% CI)b | | **Boys** |  |  |  |  |  |  | | Tanner genital stage 2 | 1,187 | -0.6 | -0.3 (-1.5 to 0.9) | 2,393 | -1.3 | -1.4 (-2.3 to -0.6) | | Tanner genital stage 3 | 1,187 | -1.3 | -1.0 (-2.1 to 0.1) | 2,393 | -1.0 | -1.1 (-2.0 to -0.3) | | Tanner genital stage 4 | 1,187 | -1.1 | -0.7 (-1.9 to 0.4) | 2,393 | -1.0 | -1.1 (-1.8 to -0.3) | | Tanner genital stage 5 | 1,187 | -1.8 | -1.2 (-3.2 to 0.8) | 2,393 | -1.8 | -1.8 (-3.0 to -0.6) | | Tanner pubic hair stage 2 | 1,187 | -0.7 | -0.5 (-1.6 to 0.7) | 2,394 | -0.9 | -0.9 (-1.7 to -0.1) | | Tanner pubic hair stage 3 | 1,187 | -0.8 | -0.6 (-1.6 to 0.4) | 2,394 | -1.2 | -1.4 (-2.1 to -0.7) | | Tanner pubic hair stage 4 | 1,187 | -0.3 | 0.2 (-0.7 to 1.1) | 2,394 | -1.3 | -1.3 (-1.9 to -0.6) | | Tanner pubic hair stage 5 | 1,187 | -1.1 | -0.6 (-1.8 to 0.7) | 2,394 | -2.1 | -2.2 (-3.1 to -1.3) | | Axillary Hair | 1,188 | -1.8 | -1.5 (-2.7 to -0.2) | 2,396 | -1.8 | -1.9 (-2.8 to -1.0) | | Acne | 1,188 | -1.3 | -1.1 (-2.2 to 0.1) | 2,396 | -1.0 | -1.0 (-1.8 to -0.1) | | Voice Break | 1,161 | -0.4 | -0.1 (-1.3 to 1.1) | 2,345 | -1.8 | -1.9 (-2.7 to -1.1) | | Adult Voice | 1,161 | -0.7 | -0.5 (-2.5 to 1.5) | 2,345 | -1.2 | -1.4 (-2.8 to 0.0) | | First ejaculation | 1,186 | -1.1 | -1.0 (-2.2 to 0.2) | 2,393 | -0.2 | -0.2 (-1.0 to 0.6) | | **Girls** |  |  |  |  |  |  | | Tanner breast stage 2 | 1,307 | -1.2 | -0.5 (-2.3 to 1.3) | 2,662 | -1.2 | -1.3 (-2.4 to -0.1) | | Tanner breast stage 3 | 1,307 | -1.0 | -0.9 (-2.0 to 0.2) | 2,662 | -0.8 | -0.8 (-1.5 to 0.0) | | Tanner breast stage 4 | 1,307 | -0.9 | -0.7 (-1.9 to 0.4) | 2,662 | -1.0 | -1.2 (-1.9 to -0.4) | | Tanner breast stage 5 | 1,307 | -2.0 | -1.6 (-3.6 to 0.3) | 2,662 | 0.0 | -0.3 (-1.7 to 1.2) | | Tanner pubic hair stage 2 | 1,308 | -0.8 | -0.5 (-1.5 to 0.4) | 2,662 | -0.9 | -0.9 (-1.5 to -0.3) | | Tanner pubic hair stage 3 | 1,308 | -1.1 | -1.0 (-1.9 to 0.0) | 2,662 | -1.3 | -1.5 (-2.1 to -0.9) | | Tanner pubic hair stage 4 | 1,308 | -0.8 | -0.7 (-1.9 to 0.5) | 2,662 | -1.3 | -1.4 (-2.2 to -0.6) | | Tanner pubic hair stage 5 | 1,308 | -2.2 | -2.2 (-4.0 to -0.4) | 2,662 | -0.9 | -0.9 (-2.1 to 0.3) | | Axillary Hair | 1,310 | -1.4 | -1.1 (-2.4 to 0.2) | 2,663 | -2.1 | -2.2 (-3.0 to -1.3) | | Acne | 1,310 | -0.8 | -0.8 (-2.3 to 0.7) | 2,663 | -1.7 | -1.5 (-2.5 to -0.5) | | Menarche | 1,307 | -1.2 | -1.0 (-1.9 to 0.0) | 2,662 | -1.2 | -1.1 (-1.8 to -0.5) | | **Notes:** aNumber of observations in adjusted analyses. Numbers vary since some children did not provide information on all outcome variables.  bAdjusted for parity, maternal age at menarche, maternal pre-pregnancy BMI, maternal smoking during first trimester and highest educational class of parents  **Abbreviations:** AGA, appropriate-for-gestational age; BMI, body mass index; CI, confidence interval; LGA, large-for-gestational age SGA, small-for-gestational age. | | | | | | | | | | | | | | | | |
